# Supplementary material
Source: PubMed Central journal article supplement (PMC3358891)
Supplement: 1118478109_pnas.1118478109_SI.pdf [file 1118478109_pnas.1118478109_SI.pdf]

# Supporting Information

Borrelli et al. 10.1073/pnas.1118478109

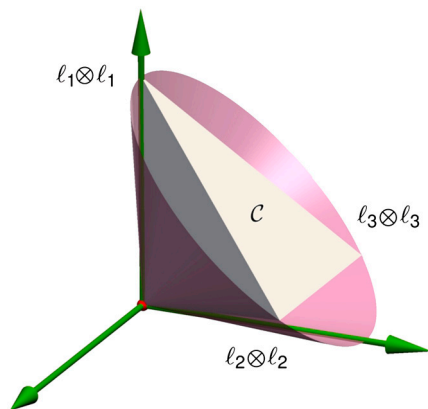

**Fig. S1.** The space of symmetric bilinear forms is identified with  $\mathbb{R}^3$  via the basis  $e_1^* \otimes e_2^* + e_2^* \otimes e_1^*$ ,  $e_2^* \otimes e_2^*$ ,  $e_1^* \otimes e_1^*$ . The cone  $\mathcal{C}$  (gray-white) lies inside the cone of inner products (purple).

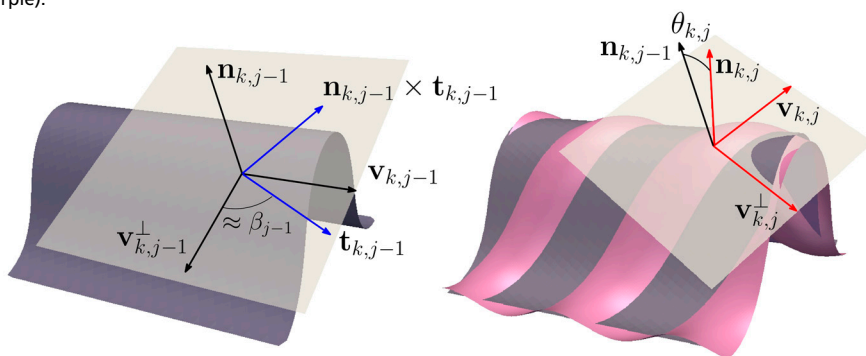

**Fig. S2.** The corrugation matrix carries the frame  $(\mathbf{v}_{k,j-1}^\perp, \mathbf{v}_{k,j-1}, \mathbf{n}_{k,j-1})$  to  $(\mathbf{v}_{k,j}^\perp, \mathbf{v}_{k,j}, \mathbf{n}_{k,j})$ . The images of the maps  $f_{k,j-1}$  and  $f_{k,j}$  are pictured by the *Left* gray and *Right* pink surfaces, respectively. Note that  $\mathbf{v}_{k,j} \approx \mathbf{t}_{k,j-1} \times \mathbf{n}_{k,j-1}$  so that the intermediary frame  $(\mathbf{t}_{k,j-1}, \mathbf{n}_{k,j-1} \times \mathbf{t}_{k,j-1}, \mathbf{n}_{k,j-1})$  is obtained by rotating  $(\mathbf{v}_{k,j-1}^\perp, \mathbf{v}_{k,j-1}, \mathbf{n}_{k,j-1})$  about  $\mathbf{n}_{k,j-1}$  by an angle approximately  $\beta_{j-1}$ . Then, the frame  $(\mathbf{v}_{k,j}^\perp, \mathbf{v}_{k,j}, \mathbf{n}_{k,j})$  is approximately the rotation of the frame  $(\mathbf{t}_{k,j-1}, \mathbf{n}_{k,j-1} \times \mathbf{t}_{k,j-1}, \mathbf{n}_{k,j-1})$  about  $\mathbf{v}_{k,j}$  by the angle  $\theta_{k,j}$ .
